# Supplementary material for: Detection of sub-microscopic blood levels of Plasmodium falciparum using Tandem Oligonucleotide Repeat Cascade Amplification (TORCA) assay with an attomolar detection limit
Source: PubMed Central journal article supplement (PMC6393570; doi:10.1038/s41598-019-39921-9), 2019-02-27

**Detection of sub-microscopic blood levels of *Plasmodium falciparum* using Tandem Oligonucleotide Repeat Cascade Amplification (TORCA) assay with an attomolar detection limit**

Andrey L. Ghindilis, Olga Chesnokov, Billy Ngasala, Maria W. Smith, Kenneth Smith, Andreas Mårtensson, and Andrew V. Oleinikov

**Supplementary Information**

**Supplementary Figure 1.** Calibration curve for RT-PCR quantification of parasitemia showing fluorescence of the DNA amplicons (Y-axis) corresponding to the simulated blood samples with different parasitemia (X-axis). Gel image quantification was done using Zen 2012 Blue software.

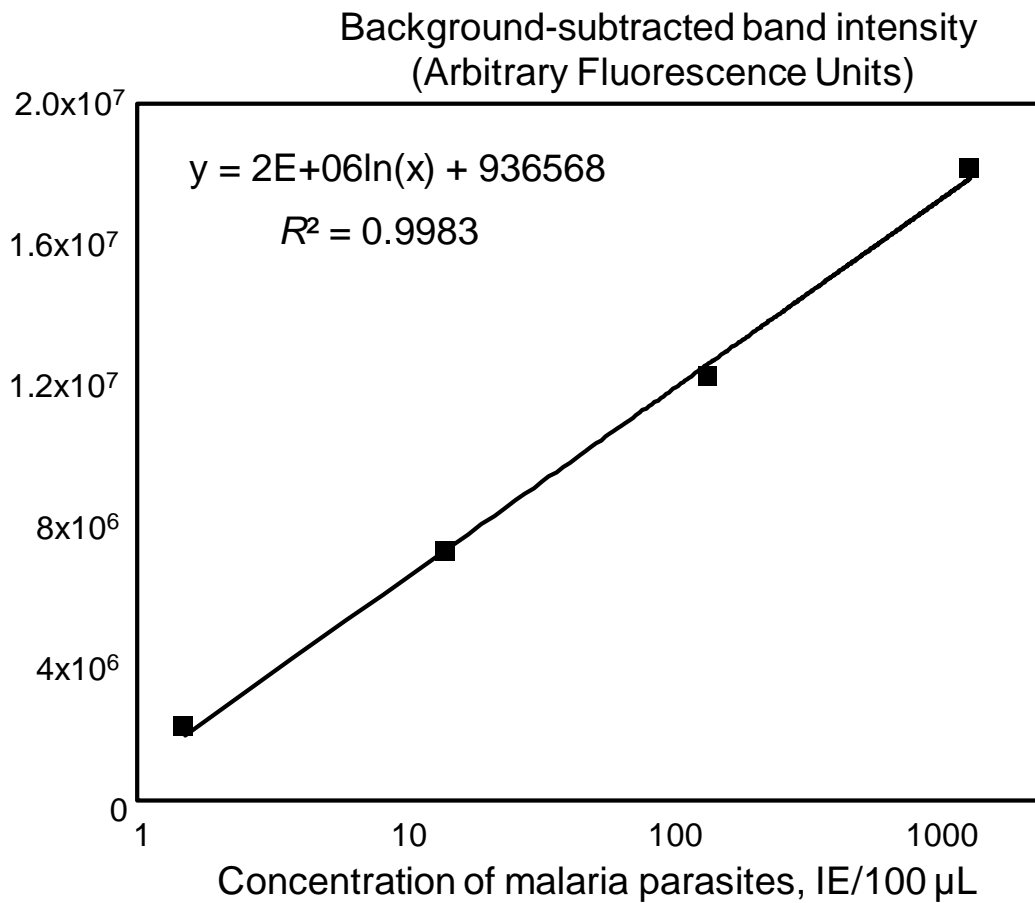

Supplement: 41598_2019_39921_MOESM1_ESM.pdf [file 41598_2019_39921_MOESM1_ESM.pdf]
